# Supplementary material
Source: PubMed Central journal article supplement (PMC9129920)
Supplement: NIHMS1803884-supplement-1.pdf [file NIHMS1803884-supplement-1.pdf]

Supplementary Table 1: Global well-being categorized by profession

|                   | Global well-being:<br>mental health |                                   | Global well-being:<br>social activities and relationships |                                   |
|-------------------|-------------------------------------|-----------------------------------|-----------------------------------------------------------|-----------------------------------|
|                   | APPs<br>(n = 70)<br>no. (%)         | Physicians<br>(n = 84)<br>no. (%) | APPs<br>(n = 70)<br>no. (%)                               | Physicians<br>(n = 84)<br>no. (%) |
| Prior to pandemic |                                     |                                   |                                                           |                                   |
| Excellent         | 33 (47.1)                           | 39 (46.4)                         | 35 (50.0)                                                 | 31 (36.9)                         |
| Very good         | 27 (38.6)                           | 39 (46.4)                         | 26 (37.1)                                                 | 43 (51.2)                         |
| Good              | 8 (11.4)                            | 6 (7.1)                           | 7 (10.0)                                                  | 9 (10.7)                          |
| Fair              | 2 (2.9)                             | 0 (0)                             | 0 (0)                                                     | 1 (1.2)                           |
| Poor              | 0 (0)                               | 0 (0)                             | 2 (2.9)                                                   | 0 (0)                             |
| During pandemic   |                                     |                                   |                                                           |                                   |
| Excellent         | 11 (15.9)                           | 23 (27.4)                         | 2 (2.9)                                                   | 9 (10.7)                          |
| Very good         | 15 (21.7)                           | 32 (38.1)                         | 5 (7.1)                                                   | 21 (25.0)                         |
| Good              | 28 (40.6)                           | 21 (25.0)                         | 26 (37.1)                                                 | 25 (29.8)                         |
| Fair              | 14 (20.3)                           | 8 (9.5)                           | 23 (32.9)                                                 | 22 (26.2)                         |
| Poor              | 1 (1.4)                             | 0 (0)                             | 14 (20.0)                                                 | 7 (8.3)                           |

APP: advanced practice provider

Global-wellbeing based on 2, single-item measures of ‘global well-being: mental health’ and ‘global well-being: social activities and relationships’.

Data not reported for 1 APP (global well-being: mental health, during pandemic)

Time period: during pandemic (March 15–April 30, 2020).
